# Supplementary material for: Novel flavan-3-ol-glutathione conjugates from the degradation of proanthocyanidins as highly bioactive antioxidants
Source: Royal Society of Chemistry journal article supplement (doi:10.1039/c9nj06207f), 2020-01-01
Supplement: c9nj06207f1.pdf [file c9nj06207f1.pdf]

## **Novel flavan-3-ol-glutathione conjugates from degradation of proanthocyanidins as high bioactive antioxidants**

Ruifang Bai<sup>a</sup>, Siqu Luo<sup>a</sup>, Lanxin Luo<sup>b</sup>, Jian Zhao<sup>b</sup>, Shuting Zhang<sup>c</sup>, Lingxi Li<sup>c</sup>, Yan Cui<sup>a\*</sup>

**Affiliation:** <sup>a</sup> School of Pharmacy, Shenyang Pharmaceutical University, 110016, Shenyang, China

<sup>b</sup> School of Traditional Chinese Materia Medica, Shenyang Pharmaceutical University, 110016, Shenyang, China

<sup>c</sup> School of Functional Food and Wine, Shenyang Pharmaceutical University, 110016, Shenyang, China

**Corresponding author:** Yan Cui, E-mail address: cuiyan\_13@126.com

Submitted to New Journal of Chemistry

**Table S1.** Experimental domain for Box-Behnken design.

| Variable                  | Factors levels |     |     |
|---------------------------|----------------|-----|-----|
|                           | -1             | 0   | 1   |
| Acidity ( $X_1$ , M)      | 0.1            | 0.2 | 0.3 |
| Temperature ( $X_2$ , °C) | 45             | 55  | 65  |
| Time ( $X_3$ , min)       | 20             | 30  | 40  |

**Table S2.** Analysis of variance (ANOVA) for surface quadratic models.

| Responses      | Source of variation           | Sum of squares | Df | Mean Squares | F Value | P value  |
|----------------|-------------------------------|----------------|----|--------------|---------|----------|
| Y <sub>1</sub> | Model                         | 1.99E+05       | 9  | 22141.61     | 757.01  | < 0.0001 |
|                | X <sub>1</sub>                | 3202.4         | 1  | 3202.4       | 109.49  | < 0.0001 |
|                | X <sub>2</sub>                | 15203.32       | 1  | 15203.32     | 519.79  | < 0.0001 |
|                | X <sub>3</sub>                | 1005.54        | 1  | 1005.54      | 34.38   | 0.0006   |
|                | X <sub>1</sub> X <sub>2</sub> | 11927.92       | 1  | 11927.92     | 407.81  | < 0.0001 |
|                | X <sub>1</sub> X <sub>3</sub> | 1922.38        | 1  | 1922.38      | 65.73   | < 0.0001 |
|                | X <sub>2</sub> X <sub>3</sub> | 4120.36        | 1  | 4120.36      | 140.87  | < 0.0001 |
|                | X <sub>1</sub> <sup>2</sup>   | 39406.38       | 1  | 39406.38     | 1347.28 | < 0.0001 |
|                | X <sub>2</sub> <sup>2</sup>   | 76016.08       | 1  | 76016.08     | 2598.94 | < 0.0001 |
|                | X <sub>3</sub> <sup>2</sup>   | 30274.14       | 1  | 30274.14     | 1035.05 | < 0.0001 |
|                | Lack of Fit                   | 151.11         | 3  | 50.37        | 3.76    | 0.1168   |
|                | C.V. %                        |                |    |              | 0.67    |          |

R<sup>2</sup>=0.9990, R<sup>2</sup> (adjusted) = 0.9977 and R<sup>2</sup> (predicted) = 0.9875.

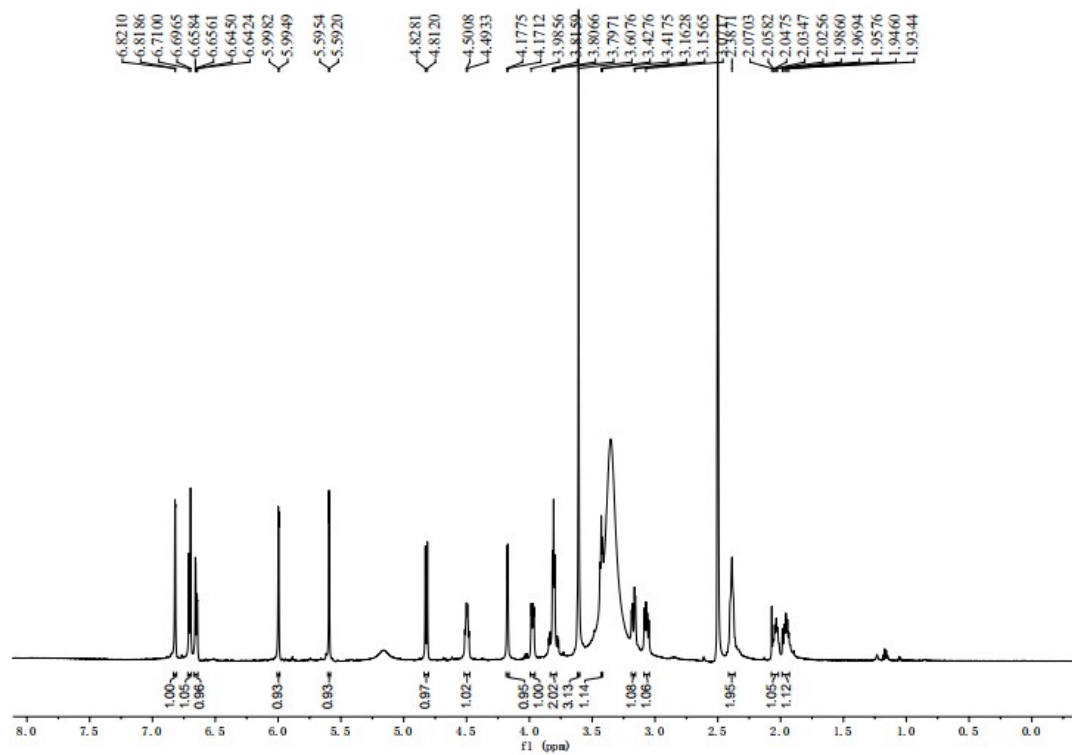

Figure S1. <sup>1</sup>H NMR spectrum (600 MHz, DMSO) of C-G-1.

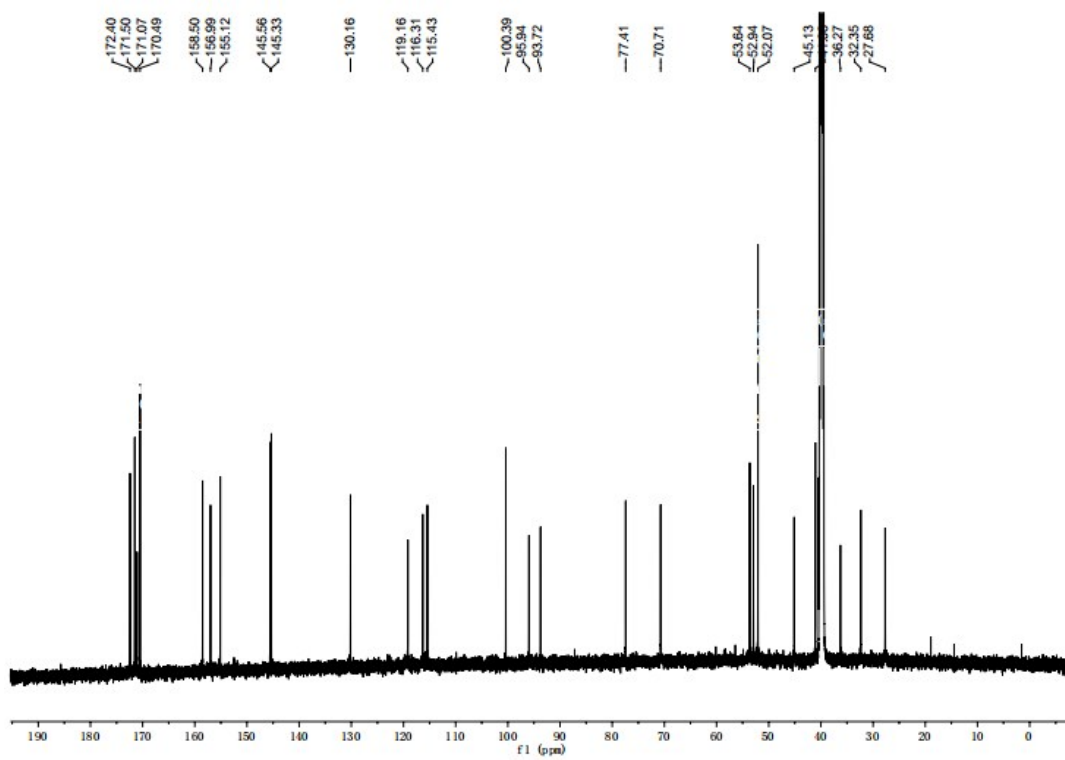

Figure S2.  $^{13}\text{C}$  NMR spectrum (150 MHz, DMSO) of C-G-1.

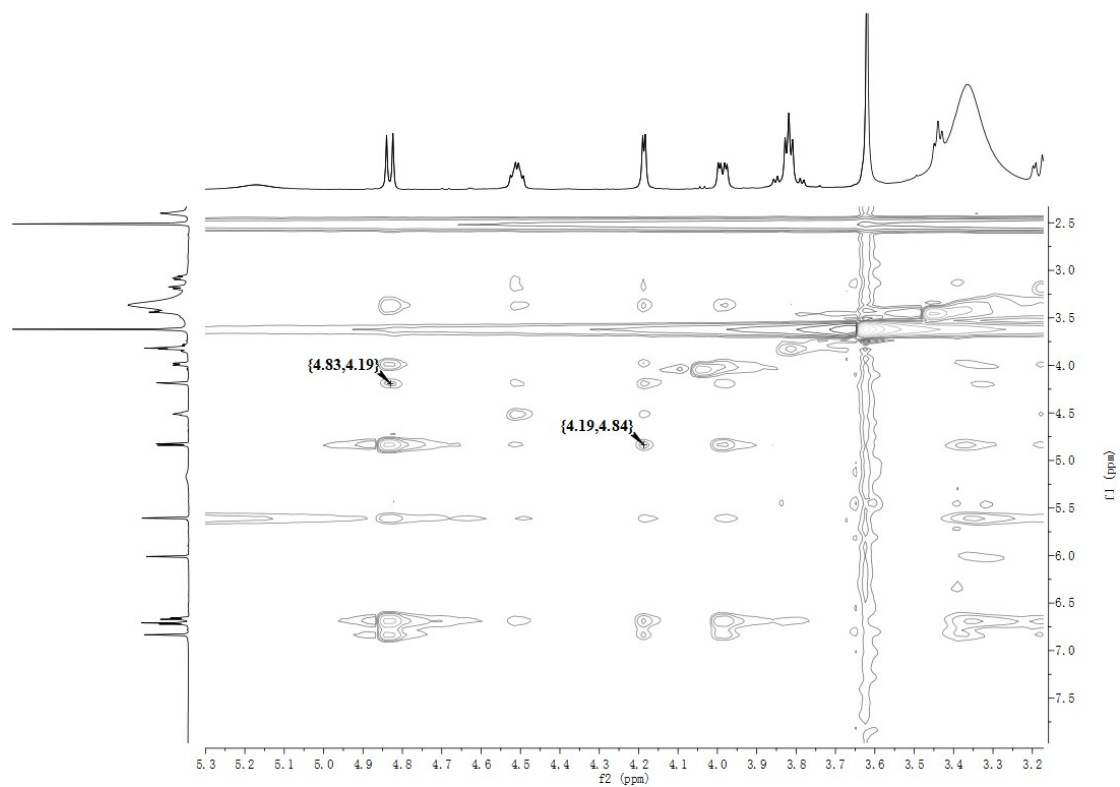

**Figure S3.** NOESY spectrum (600 MHz, DMSO) of C-G-1.

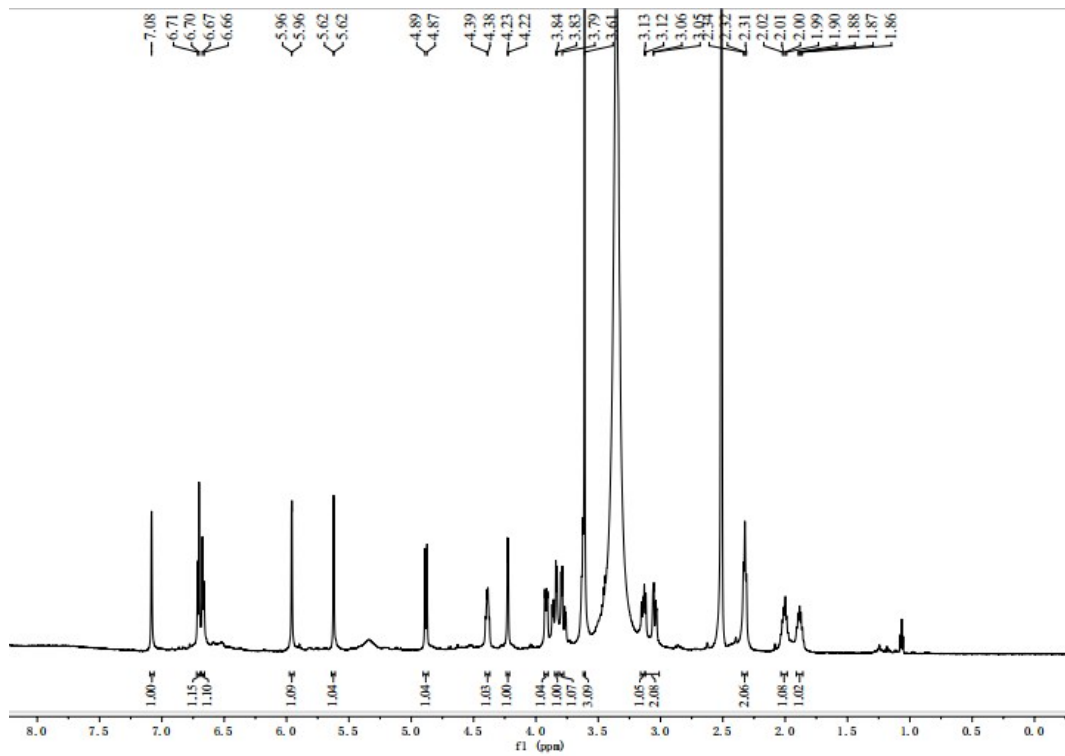

Figure S4. <sup>1</sup>H NMR spectrum (600 MHz, DMSO) of C-G-2.

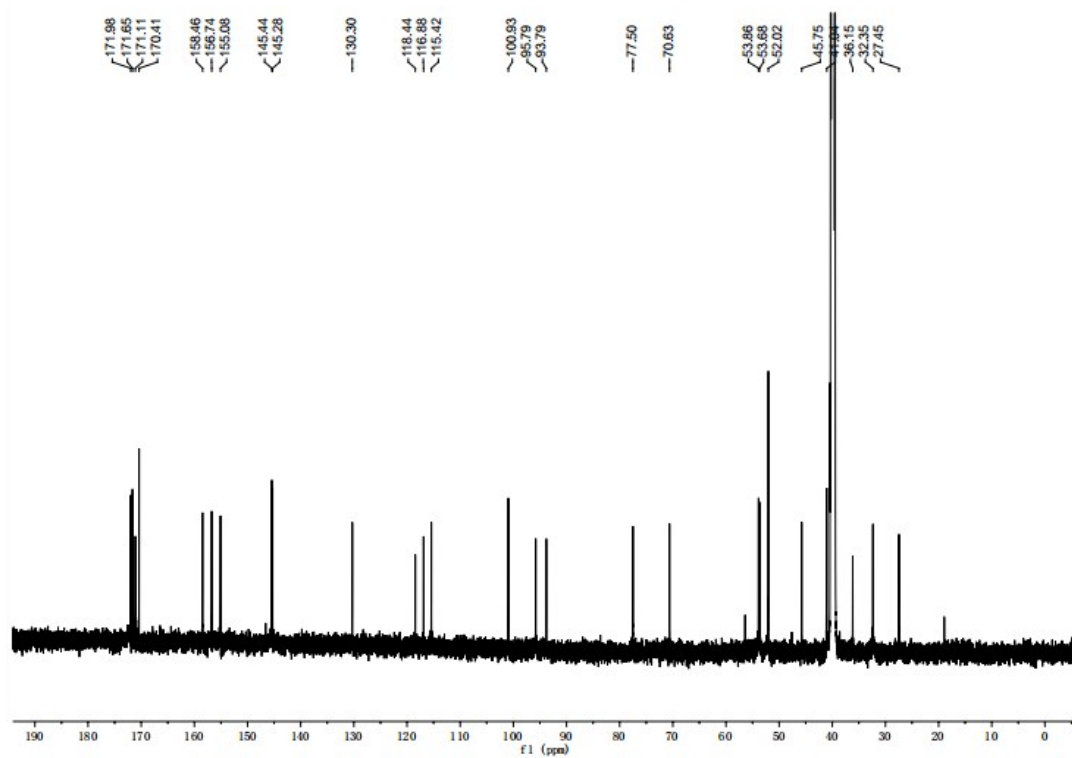

**Figure S5.**  $^{13}\text{C}$  NMR spectrum (150 MHz, DMSO) of C-G-2.



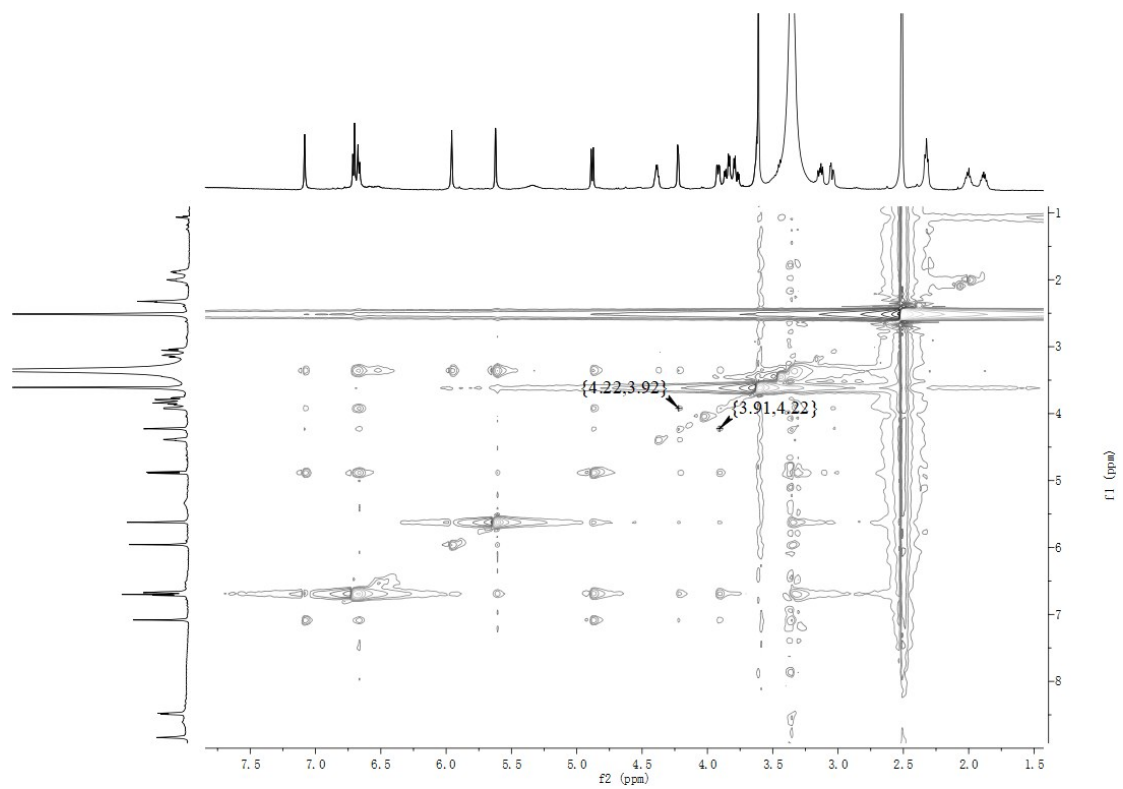

**Figure S6.** NOESY spectrum (600 MHz, DMSO) of C-G-2.

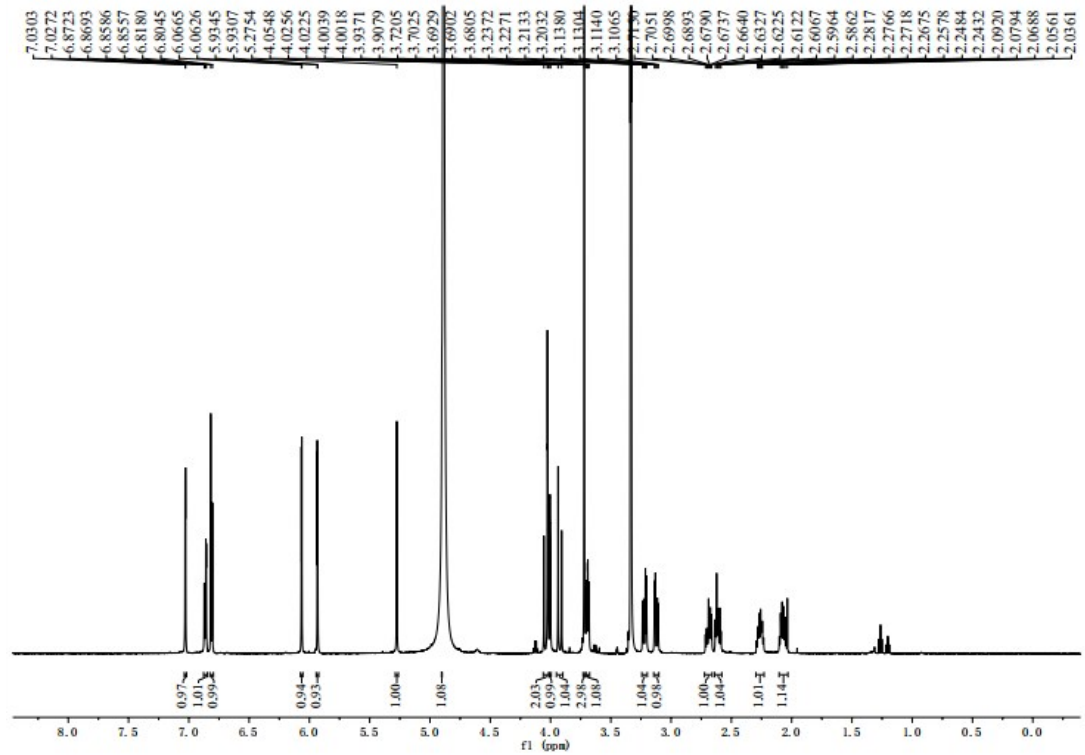

Figure S7. <sup>1</sup>H NMR spectrum (600 MHz, CD<sub>3</sub>OD) of EC-G.

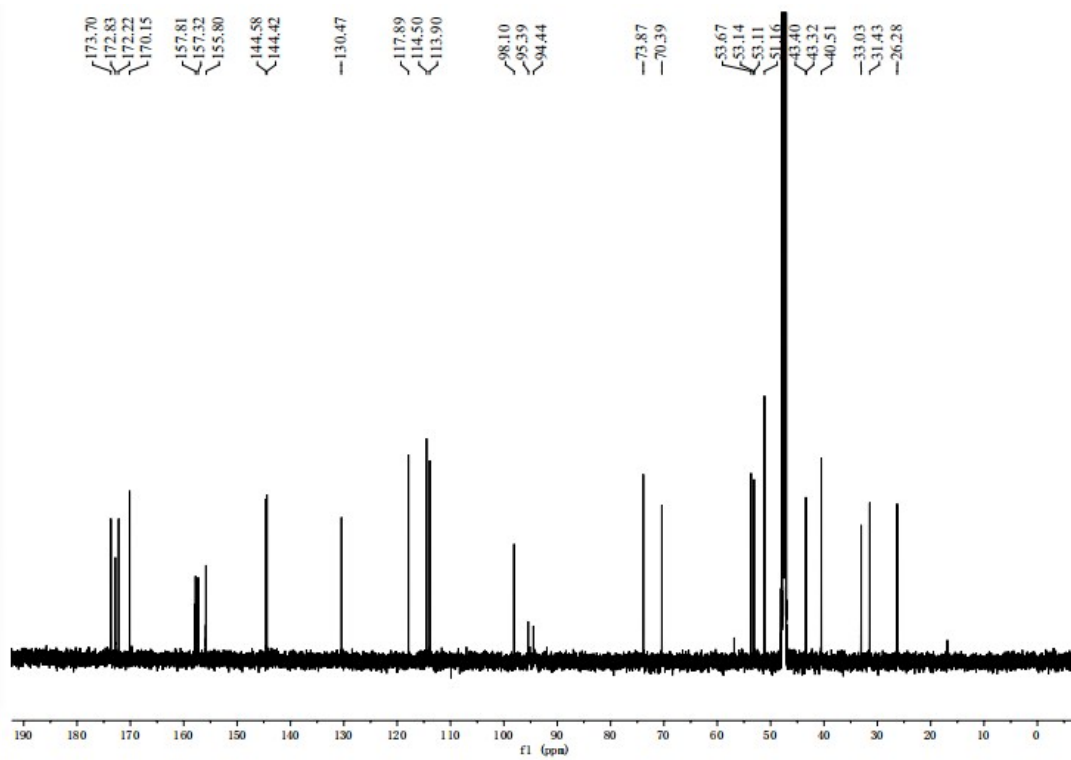

**Figure S8.**  $^{13}\text{C}$  NMR spectrum (150 MHz,  $\text{CD}_3\text{OD}$ ) of EC-G.

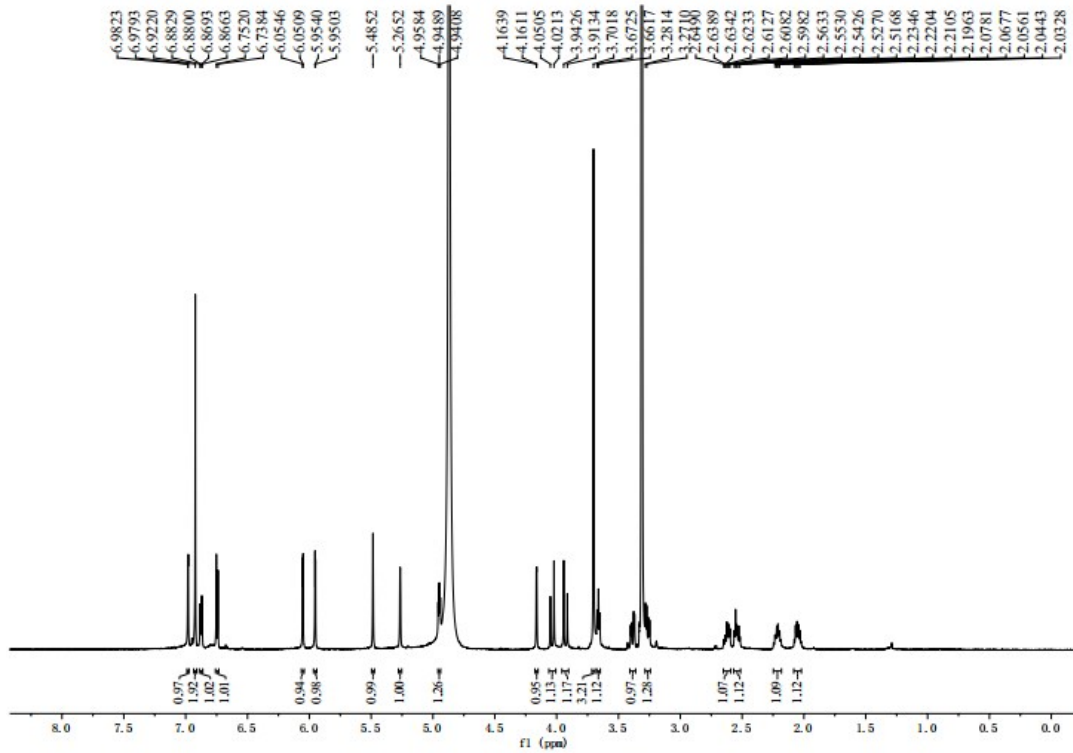

Figure S9. <sup>1</sup>H NMR spectrum (600 MHz, CD<sub>3</sub>OD) of ECG-G.

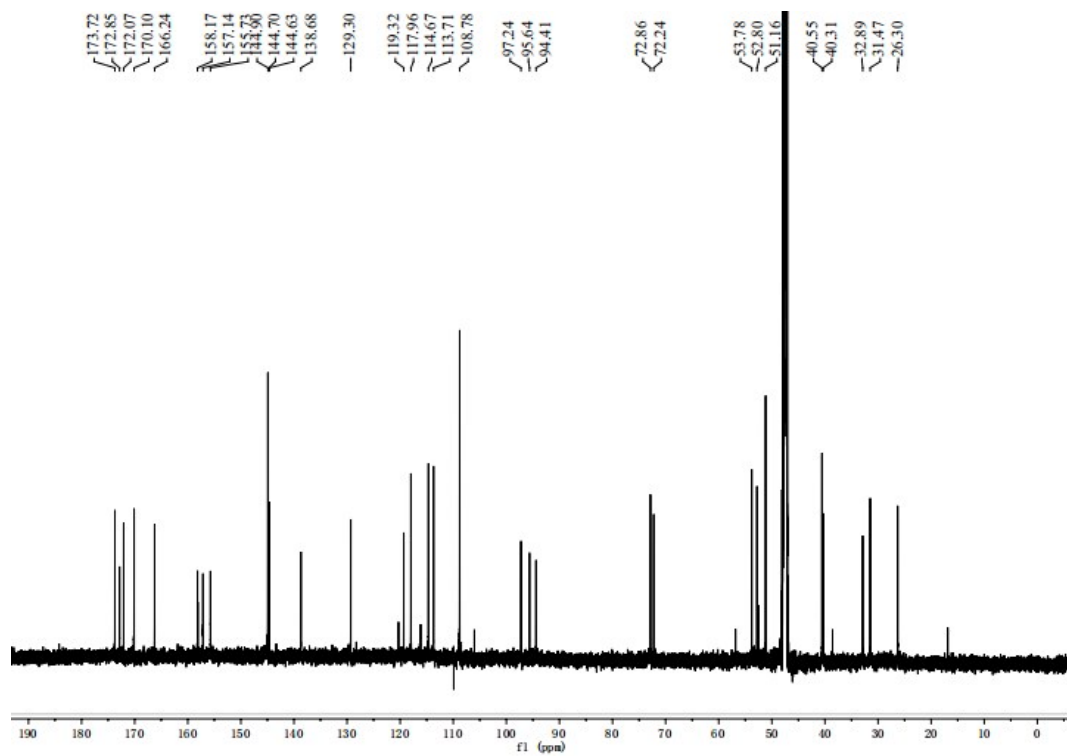

**Figure S10.**  $^{13}\text{C}$  NMR spectrum (150 MHz,  $\text{CD}_3\text{OD}$ ) of ECG-G.
